# Supplementary material for: Probing the promotional roles of cerium in the structure and performance of Cu/SiO2 catalysts for ethanol production
Source: Royal Society of Chemistry journal article supplement (doi:10.1039/c8cy02093k), 2018-01-01
Supplement: c8cy02093k1.pdf [file c8cy02093k1.pdf]

## Supporting information

### Probing the promotional roles of cerium in structure and performance of Cu/SiO<sub>2</sub> catalysts for ethanol production

Peipei Ai<sup>a, ‡</sup>, Minghui Tan<sup>c, ‡</sup>, Prasert Reubroycharoen<sup>d</sup>, Yang Wang<sup>b</sup>, Xiaobo Feng<sup>b</sup>,  
Guoguo Liu<sup>b</sup>, Guohui Yang<sup>b, c, \*</sup>, Noritatsu Tsubaki<sup>b, \*</sup>

<sup>a</sup> Key Laboratory of Coal Science and Technology of Ministry of Education and Shanxi  
Province, Taiyuan University of Technology, Taiyuan, Shanxi 030024, PR China

<sup>b</sup> Department of Applied Chemistry, School of Engineering, University of Toyama,  
Gofuku 3190, Toyama 930-8555, Japan

<sup>c</sup> State Key Laboratory of Coal Conversion, Institute of Coal Chemistry, Chinese  
Academy of Sciences, Taiyuan 030001, PR China

<sup>d</sup> Department of Chemical Technology, Faculty of Science, Chulalongkorn University,  
Bangkok 10330, Thailand

\* Corresponding Author: E-mail: yanggh@sxicc.ac.cn (Guohui Yang) tsubaki@eng.u-  
toyama.ac.jp (Noritatsu Tsubaki)

‡ These authors contributed equally to this work.

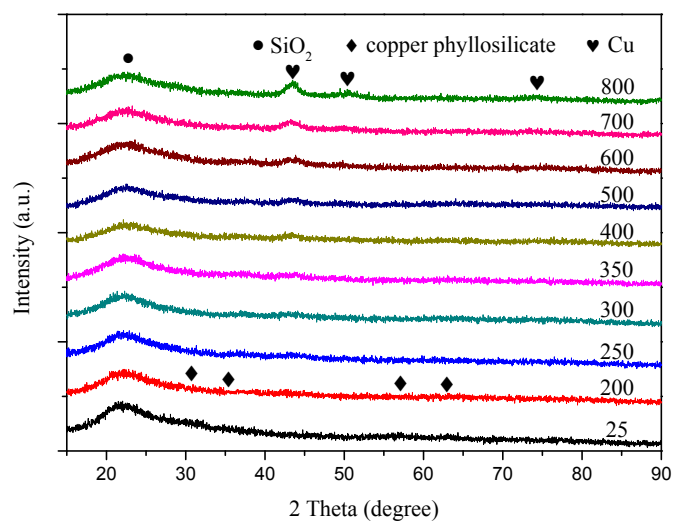

**Figure S1** In situ XRD patterns after reduction at different temperatures for the calcined 2Ce-Cu/SiO<sub>2</sub> catalyst.

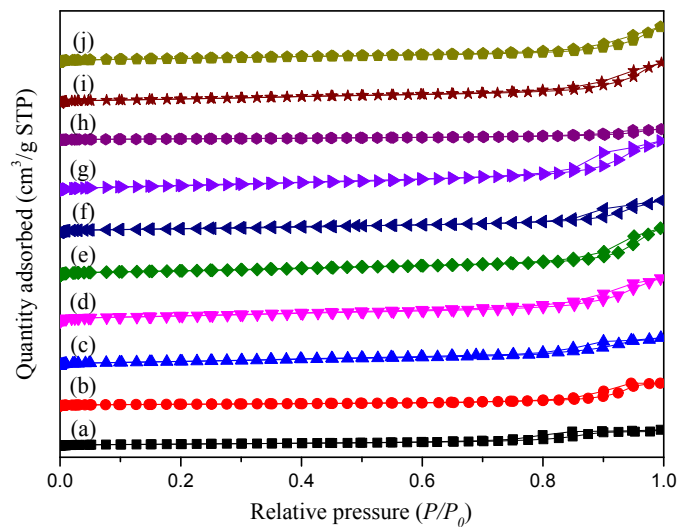

**Figure S2** N<sub>2</sub> physisorption isotherms of (a) SiO<sub>2</sub>, (b) 1Ce/SiO<sub>2</sub>, (c) Cu/SiO<sub>2</sub>, (d) 0.5Ce-Cu/SiO<sub>2</sub>, (e) 1Ce-Cu/SiO<sub>2</sub>, (f) 1.5Ce-Cu/SiO<sub>2</sub>, (g) 2Ce-Cu/SiO<sub>2</sub>, (h) Cu/CeO<sub>2</sub>, (i) 1Ce-Cu/SiO<sub>2</sub>-i and (j) 1Ce-Cu/SiO<sub>2</sub> catalysts.

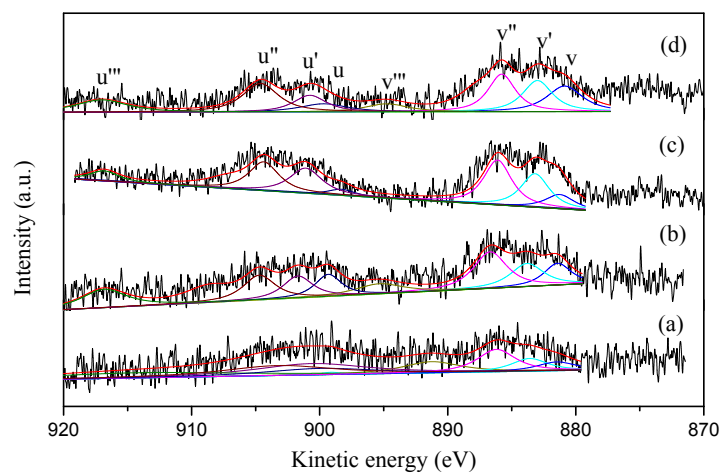

**Figure S3** Ce XPS of reduced (a) 0.5Ce-Cu/SiO<sub>2</sub>, (b) 1Ce-Cu/SiO<sub>2</sub>, (c) 1.5Ce-Cu/SiO<sub>2</sub>, and (d) 2Ce-Cu/SiO<sub>2</sub> catalysts.

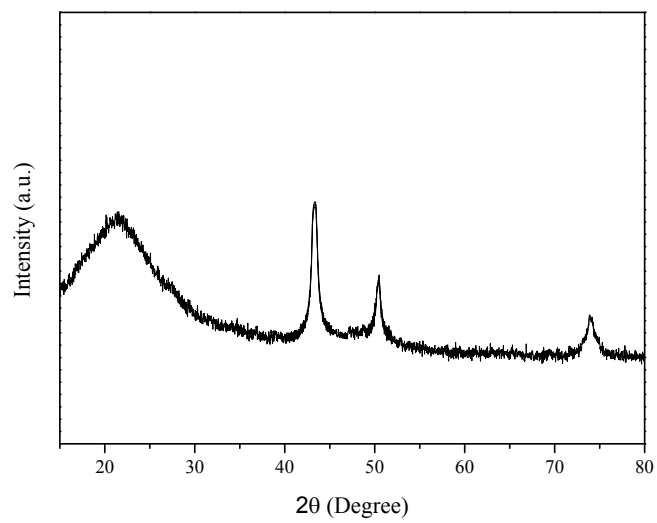

**Figure S4** XRD pattern of spent Cu/SiO<sub>2</sub> catalyst after 100 h reaction.

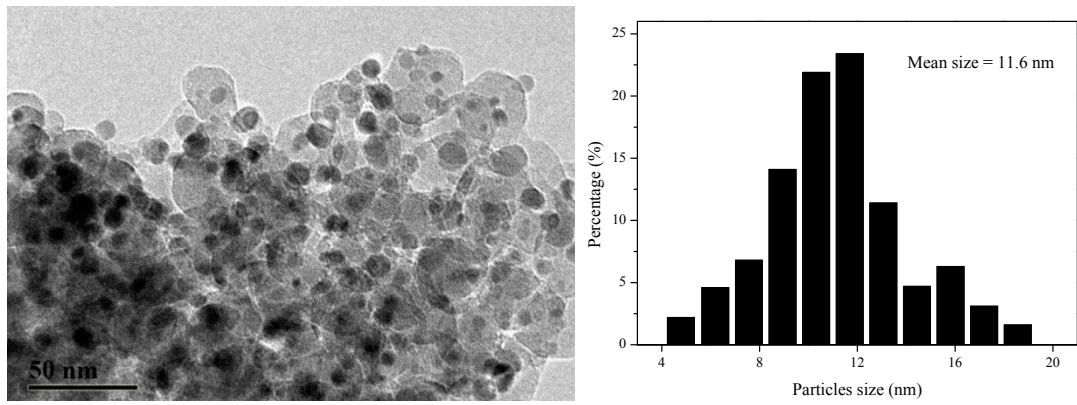

**Figure S5** TEM image and particles size distribution of spent Cu/SiO<sub>2</sub> catalyst.

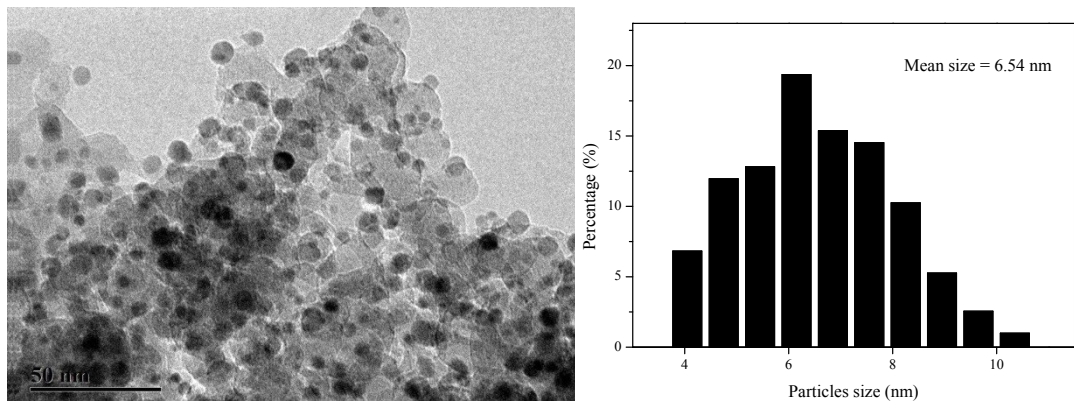

**Figure S6** TEM image and particles size distribution of spent 1Ce-Cu/SiO<sub>2</sub> catalyst.

**Table S1** Catalytic performance of 1Ce-Cu/SiO<sub>2</sub> catalysts under different reaction temperature

| Catalyst                | T   | Conv. (%) | Sel. (%) |      |      |        |
|-------------------------|-----|-----------|----------|------|------|--------|
|                         |     |           | Ethanol  | MG   | EG   | Others |
| 1Ce-Cu/SiO <sub>2</sub> | 300 | 100.0     | 88.6     | 0.8  | 0.8  | 9.8    |
| 1Ce-Cu/SiO <sub>2</sub> | 280 | 100.0     | 91.8     | 0.5  | 0.7  | 7.0    |
| 1Ce-Cu/SiO <sub>2</sub> | 260 | 99.8      | 73.2     | 1.0  | 9.8  | 16.0   |
| 1Ce-Cu/SiO <sub>2</sub> | 240 | 99.8      | 31.3     | 0.5  | 55.7 | 12.5   |
| 1Ce-Cu/SiO <sub>2</sub> | 220 | 99.5      | 8.6      | 0.6  | 85.4 | 5.4    |
| 1Ce-Cu/SiO <sub>2</sub> | 200 | 99.5      | 2.2      | 0.1  | 95.7 | 2.0    |
| 1Ce-Cu/SiO <sub>2</sub> | 180 | 87.9      | 0.6      | 22.9 | 71.7 | 4.8    |

Reaction conditions: P = 2.5 MPa, WHSV = 0.8 h<sup>-1</sup>, H<sub>2</sub>/DMO molar ratio = 200, reaction time= 8 h. MG: methyl glycolate, EG: ethylene glycol, others mainly consist of methyl methoxyacetate, methyl acetate, 1, 2-propanediol, 1, 2-butanediol and dimethyl carbonate.
